# Supplementary material for: Molecular identification and functional characterization of the cathepsin B gene (Ab-cb-1) in the plant parasitic nematode Aphelenchoides besseyi
Source: PubMed Central journal article supplement (PMC6025850; doi:10.1371/journal.pone.0199935), 2018-06-29
Supplement: pone.0199935.s001.pdf [file pone.0199935.s001.pdf]

1 MKTKNNDLILDKNNFNHDAYRRMRVSHSAEALEGQELVDYVNGRQNLRTATSNNKFAKYT  
61 KEEKKQLMGVLNVRNPIKARRNMSPTRYMDIQLPESFDSRKQWGS MCRSVTEVRD QSSCG  
121 SCWSFGAVEAMSDRICIHSNGSIQVDLSAKDLLSCCKACGFGCNGGEPFEAWSFWHTSGI  
181 VTGSNYTTKKGCQPYTFPECEHHSTKAHFKPCPKELYPTPKCEKTCQEGYDKEYNADKYY  
241 GQEPYAVDEDQEAIKKELYLNPLEVSFEVYDDFLTYSGGVYVHQGRIDGGHAVKLVGW  
301 GTENEVPYWIVANSWNTDFGEDGYFRILRGSNECGIEFGVVGGLPDLKRSPHRVHYHHHH  
361 SSASSYDIF
